# Supplementary material for: Effect of fixed orthodontic appliances on gingival status and oral microbiota: a pilot study
Source: PubMed Central journal article supplement (PMC9615380; doi:10.1186/s12903-022-02511-9), 2022-10-27
Supplement: 12903_2022_2511_MOESM1_ESM.pdf [file 12903_2022_2511_MOESM1_ESM.pdf]

**Table S1.** Literature review of studies focusing on the effect of fixed orthodontic appliances on oral microbiota, which were not included in the meta-analysis by Guo et al., 2017

| Population                                                           | T*                                                      | Oral bacteria                                                                                                                                                                                                                                                                                                                                                                                                                                                                                                                                                                                                                         | Oral candida                                                                                                                                               | Reference |
|----------------------------------------------------------------------|---------------------------------------------------------|---------------------------------------------------------------------------------------------------------------------------------------------------------------------------------------------------------------------------------------------------------------------------------------------------------------------------------------------------------------------------------------------------------------------------------------------------------------------------------------------------------------------------------------------------------------------------------------------------------------------------------------|------------------------------------------------------------------------------------------------------------------------------------------------------------|-----------|
| N<br>Mean/median<br>age in years<br>Type of sample<br>PI/GI          | (time of the<br>sample collection)                      |                                                                                                                                                                                                                                                                                                                                                                                                                                                                                                                                                                                                                                       |                                                                                                                                                            |           |
| 30 patients<br>Age: 12 – 18<br>years<br>Stimulated<br>saliva samples | T0 = 0<br>T1 = 4 weeks<br>T2 = 12 weeks                 | All samples were positive for<br><i>Neisseria</i> sp.<br><br>Following changes were<br>observed, but they were NS.<br><br><i>S. mitis/oralis</i> increased at T1,<br>but decrease almost to the initial<br>levels at T2<br><i>S. anginosus</i> – a slight decrease<br>at T1<br><i>S. mutans</i> – decrease at T1<br><i>S. salivarius</i> increased a bit at T2<br><i>S. sanguinis</i> decrease at both<br>times, T1 and T2<br><i>S. parasanguinis</i> decrease at T1<br>and increase at T2<br>Coagulase – negative<br>staphylococci decrease at T1 but<br>increase at T2<br><br><i>Staphylococcus aureus</i> decrease<br>at T1 and T2 | All samples were negative<br>for <i>Candida albicans</i> .                                                                                                 | (28)      |
| 17 patients<br>Age: 11 – 30<br>years<br>Oral rinses                  | T0 = 0<br>T1 = 2 weeks<br>T2 = 6 weeks<br>T3 = 12 weeks | NA                                                                                                                                                                                                                                                                                                                                                                                                                                                                                                                                                                                                                                    | Increase of number of the<br>colony forming units of<br>the <i>Candida</i> sp. during<br>orthodontic treatment (NS)<br><br>Dominance of <i>C. albicans</i> | (11)      |
| 124 patients<br>Mean age 19.5<br>years                               | T0 = 0<br>T1 = 1 month<br>T2 = 6 months                 | NA                                                                                                                                                                                                                                                                                                                                                                                                                                                                                                                                                                                                                                    | NS difference in the<br>presence of <i>C. albicans</i><br>during treatment by an<br>orthodontic appliance.                                                 | (17)      |

|                                                                                          |                                                    |                                                                                                           |                                                                                                       |      |
|------------------------------------------------------------------------------------------|----------------------------------------------------|-----------------------------------------------------------------------------------------------------------|-------------------------------------------------------------------------------------------------------|------|
| Oral swab                                                                                | T3 = 1 year after treatment                        |                                                                                                           |                                                                                                       |      |
|                                                                                          | T4 = 6 months after completion of ortho. treatment |                                                                                                           |                                                                                                       |      |
| 50 patients<br>(case/control)                                                            | T = NA                                             | Isolation of various <i>Streptococci</i> and <i>Enterococci</i> in patients treated with fixed appliances | Correlation between the duration of treatment by fixed appliances and frequency of <i>Candida</i> sp. | (8)  |
| Age: 14 – 23 years                                                                       |                                                    | Low prevalence of live protozoans: <i>Trichomonas tenax</i> and <i>Entamoeba gingivalis</i>               | Presence of <i>C. albicans</i> correlates with poor oral hygiene                                      |      |
| Oral swabs                                                                               |                                                    | Detection of <i>Acanthamoeba</i> sp. cyst in several patients treated with fixed appliances               |                                                                                                       |      |
| No statistically significant difference in PI in the group treated with fixed appliances |                                                    |                                                                                                           |                                                                                                       |      |
| 15 patients                                                                              | T0 = 0                                             | Purple complex was significantly decreasing from T2                                                       | <i>Candida</i> sp. decreased significantly at T2 and the lowest value was at T3                       | (19) |
| Age: 11 – 41 years                                                                       | T1 = 30 days                                       | Green complex was at the lowest level at T3                                                               |                                                                                                       |      |
| Nonstimulated saliva samples                                                             | T2 = 60 days                                       | Yellow and orange complexes decreased significantly only at T3                                            |                                                                                                       |      |
| No statistically significant difference in PI and GI                                     | T3 = 90 days                                       | Red complex decreased significantly at T2 and the lowest value was at T3                                  |                                                                                                       |      |
| 90 patients                                                                              | T = NA                                             | NA                                                                                                        | Fixed orthodontic appliances did not enhance colonization of <i>Candida</i> sp.                       | (16) |
| Mean age 20.6 ± 7.1 years                                                                |                                                    |                                                                                                           |                                                                                                       |      |
| Oral swabs                                                                               |                                                    |                                                                                                           |                                                                                                       |      |
| 75 patients<br>(3 groups,<br>good oral                                                   | T0# <sup>GOH</sup> = 14.9 ± 7.9 months             | <i>S. mutans</i> and <i>Lactobacilli</i> were detected in all patients                                    | 73.4% of the patients were positive for <i>Candida</i> sp. in                                         | (9)  |

hygiene – GOH, poor oral hygiene (POH, POH and white spot lesion – POH/WSL, 25 patients per group)

T0#<sup>POH</sup> = 13.4 ± 6.7 months

T0#<sup>POH/WSL</sup> = 19.6 ± 11.3 months

Higher prevalence of *S. mutans* in patients with poor oral hygiene (NS)

Higher prevalence of *Lactobacilli*. A significant difference was observed between the GOH and POH/WSL groups

saliva and 60.9 % in dental plaque.

Significantly lower prevalence of *Candida* sp. in GOH than in POH and in POH/WSL was observed.

Mean age 14.4 ±1.5 years

Stimulated saliva and plaque samples

---

|                    |               |                                                                                                                         |                                                                                                                                                                              |
|--------------------|---------------|-------------------------------------------------------------------------------------------------------------------------|------------------------------------------------------------------------------------------------------------------------------------------------------------------------------|
| 30 patients        | T0 = 0        | Significant increase of <i>S. mutans</i> and <i>Lactobacillus acidophilus</i> in T1 and continued up to T2 was observed | Total count of <i>Candida</i> sp. increased significantly during treatment by orthodontic appliances (starting from T1).<br><br><i>C. albicans</i> was the most predominant. |
| Age: 12 – 18 years | T1 = 6 weeks  |                                                                                                                         |                                                                                                                                                                              |
| Saliva sample      | T2 = 12 weeks |                                                                                                                         |                                                                                                                                                                              |
|                    | T3 = 18 weeks |                                                                                                                         |                                                                                                                                                                              |

---

|                           |                                                               |    |                                                                                                                     |
|---------------------------|---------------------------------------------------------------|----|---------------------------------------------------------------------------------------------------------------------|
| 50 patients               | T= 1,2,3,6 months before and after the beginning of treatment | NA | Significant increase of <i>Candida</i> sp. within 3 months after the installation of the orthodontic appliance (18) |
| Age 10 - 18 years         |                                                               |    |                                                                                                                     |
| Samples via gargle method |                                                               |    |                                                                                                                     |

---

|                    |               |                                                      |                                                 |
|--------------------|---------------|------------------------------------------------------|-------------------------------------------------|
| 60 patients        | T0 = 0        | A dramatic increase of <i>S. mutans</i> at T1 and T2 | Increase of <i>Candida</i> sp. at T1 and T2 (5) |
| Age: 13 – 18 years | T1 = 2 months |                                                      |                                                 |
| Plaque samples     | T2 = 3 months |                                                      |                                                 |

---

|                                                                                |               |    |                                                                                                         |
|--------------------------------------------------------------------------------|---------------|----|---------------------------------------------------------------------------------------------------------|
| 60 patients                                                                    | T0 = 0        | NA | Significant increase of <i>Candida</i> at T1 in the group treated with fixed orthodontic appliance (15) |
| (28 patients with fixed orthodontic appliance and 32 with removable appliance) | T1 = 6 months |    | In the group treated with removable appliances, the increase of <i>Candida</i> was not significant      |
| Age: 4 – 10 years                                                              |               |    | At T0, the most frequently isolated species was <i>C. albicans</i>                                      |

Oral swabs

At T1, the most frequently found species was *C. tropicalis*

---

|                                                                                                                                                                                                                            |                                            |                                                                                                                       |    |      |
|----------------------------------------------------------------------------------------------------------------------------------------------------------------------------------------------------------------------------|--------------------------------------------|-----------------------------------------------------------------------------------------------------------------------|----|------|
| 95 patients<br>(orthodontic group, 48 patients;<br>control group, without appliances, 47 patients)<br><br>Age: 12 - 16 years<br><br>Stimulated saliva sample                                                               | T0 = 0<br><br>T1 = 6 months                | Significant increase of <i>S. mutans</i> and <i>Lactobacillus</i> sp. at T1 in orthodontic group                      | NA | (10) |
| 60 patients<br>(orthodontic group, 30 patients;<br>control group, without appliances, 30 patients)<br><br>Age: 12 – 20 years<br><br>Plaque samples<br><br>Significant difference in PI in orthodontic and control subjects | T1 = 12.4 ± 6.2 months<br><br>T2 = 3 years | Statistically significant greater prevalence of <i>Aggregatibacter actinomycetemcomitans</i> in the orthodontic group | NA | (13) |

---

GI, gingival index; GOH, good oral hygiene; NA, not available; NS, non-significant; PI, plaque index; POH, poor oral hygiene; POH/WSL, poor oral hygiene and white spot lesion; ROA, removable orthodontic appliance; \*T0, Before bonding of fixed orthodontic appliances; T1, T2, T3, After bonding of fixed orthodontic appliances

# The mean wearing time at the time of samples collection; the orthodontic appliance was applied for a significantly longer time in the POH/WSL group than in other groups ( $p = 0.017$ )

**Table S2.** Correlations between the different taste preferences and changes in the oral environment of 30 patients

| Deterioration of              | PI       | GI       | percentage of 7 periodontal bacteria | percentage of 3 cariogenic bacteria | <i>Candida</i> sp. | <i>Candida</i> sp. and 7 periodontal bacteria |
|-------------------------------|----------|----------|--------------------------------------|-------------------------------------|--------------------|-----------------------------------------------|
| <b>Favorite taste – sweet</b> |          |          |                                      |                                     |                    |                                               |
| yes (n=13)                    | 10 (77%) | 7 (54%)  | 8 (62%)                              | 6 (46%)                             | 5 (39%)            | 10 (77%)                                      |
| no (n=16)                     | 8 (50%)  | 4 (25%)  | 8 (50%)                              | 13 (81%)                            | 0 (0%)             | 8 (50%)                                       |
| <i>p</i> -value               | 0.249    | 0.143    | 0.711                                | 0.064                               | <b>0.011</b>       | 0.249                                         |
| <b>Sweetening drinks</b>      |          |          |                                      |                                     |                    |                                               |
| yes (n=13)                    | 8 (62%)  | 5 (39%)  | 6 (46%)                              | 10 (77%)                            | 3 (23%)            | 8 (62%)                                       |
| no (n=17)                     | 10 (59%) | 6 (35%)  | 11 (65%)                             | 10 (59%)                            | 2 (12%)            | 11 (65%)                                      |
| <i>p</i> -value               | 1.000    | 1.000    | 0.460                                | 0.440                               | 0.628              | 1.000                                         |
| <b>Alcoholic drinks</b>       |          |          |                                      |                                     |                    |                                               |
| yes (n=9)                     | 5 (56%)  | 5 (56%)  | 5 (56%)                              | 5 (56%)                             | 1 (11%)            | 5 (56%)                                       |
| no (n=21)                     | 13 (62%) | 6 (29%)  | 12 (57%)                             | 15 (71%)                            | 4 (19%)            | 14 (67%)                                      |
| <i>p</i> -value               | 1.000    | 0.225    | 1.000                                | 0.431                               | 1.000              | 0.687                                         |
| <b>Energy drinks</b>          |          |          |                                      |                                     |                    |                                               |
| yes (n=9)                     | 4 (44%)  | 1 (11%)  | 3 (33%)                              | 8 (89%)                             | 1 (11%)            | 4 (44%)                                       |
| no (n=21)                     | 14 (67%) | 10 (48%) | 14 (67%)                             | 12 (57%)                            | 4 (19%)            | 15 (71%)                                      |
| <i>p</i> -value               | 0.418    | 0.100    | 0.123                                | 0.204                               | 1.000              | 0.225                                         |

GI, gingival index; PI, plaque index

**Table S3.** The percentages of 3 selected cariogenic and 7 periodontal bacteria relative to the total prokaryotic DNA at two time points – T0 (before bonding of fixed orthodontic appliances) and T1 (till the end of 7<sup>th</sup> month after bonding of fixed orthodontic appliances) in 30 patients

| <b>Selected bacteria</b>                     | <b>The difference in % of the total prokaryotic genome in GCF samples between T0 and T1<br/>mean, median (5<sup>th</sup>, 95<sup>th</sup> PCTL)</b> | <b>p-value</b> |
|----------------------------------------------|-----------------------------------------------------------------------------------------------------------------------------------------------------|----------------|
| <i>Streptococcus mutans</i>                  | 0, 0 (-0.02, 0.01)                                                                                                                                  | 0.889          |
| <i>Lactobacillus</i> sp.                     | 0, 0 (-0.02, 0.01)                                                                                                                                  | 0.136          |
| <i>Actinomyces</i> sp.                       | 0.85, 0.44 (-1.10, 5.52)                                                                                                                            | <b>0.027</b>   |
| <b>All 3 cariogenic bacteria</b>             | 0.84, 0.44 (-1.10, 5.45)                                                                                                                            | <b>0.030</b>   |
| <i>Aggregatibacter actinomycetemcomitans</i> | -0.02, 0 (-0.04, 0.01)                                                                                                                              | 0.866          |
| <i>Porphyromonas gingivalis</i>              | 0, 0 (0, 0)                                                                                                                                         | 1.000          |
| <i>Tannerella forsythia</i>                  | 0, 0 (0, 0)                                                                                                                                         | 1.000          |
| <i>Treponema denticola</i>                   | 0, 0 (0, 0)                                                                                                                                         | 0.317          |
| <i>Parvimonas micra</i>                      | 0, 0 (0, 0)                                                                                                                                         | 0.317          |
| <i>Prevotella intermedia</i>                 | 0, 0 (0, 0)                                                                                                                                         | 0.314          |
| <i>Fusobacterium nucleatum</i>               | 0.95, 0.13 (-2.98, 8.98)                                                                                                                            | 0.339          |
| <b>All 7 periodontal bacteria</b>            | 0.94, 0.13 (-2.98, 8.98)                                                                                                                            | 0.329          |
| <b>All 10 bacteria</b>                       | 1.78, 0.47 (-2.04, 11.75)                                                                                                                           | 0.086          |

T0, before bonding of fixed orthodontic appliances; GCF, gingival crevicular fluid; please note that when sampling GCF, dental plaque is sampled as well

p-value: The difference between T1 and T0 measurements is evaluated using the Wilcoxon matched-pairs signed-rank test.
